Articles of interest in other COB journals

From *Journal of Cell Science*

**Reduction of Crk and CrkL expression blocks reelin-induced dendritogenesis**

Tohru Matsuki, Albéna Pramatarova and Brian W. Howell

Matsuki, T. et al. 2008. *J. Cell Sci.* doi:10.1242/jcs.027334

**The intraflagellar transport protein IFT57 is required for cilia maintenance and regulates IFT-particle–kinesin-II dissociation in vertebrate photoreceptors**

Bryan L. Krock and Brian D. Perkins

Krock, B. L. et al. 2008. *J. Cell Sci.* doi:10.1242/jcs.029397
